# Supplementary material for: Colloidal synthesis of the mixed ionic–electronic conducting NaSbS2 nanocrystals
Source: Royal Society of Chemistry journal article supplement (doi:10.1039/d3nh00097d), 2023-01-01
Supplement: d3nh00097d1.pdf [file d3nh00097d1.pdf]

## Supporting Information for

# Colloidal Synthesis of the Mixed Ionic-Electronic Conducting NaSbS<sub>2</sub> Nanocrystals

Maria Zubair, Syed Abdul Ahad, Ibrahim Saana Amiinu, Vasily A. Lebedev, Mohini Mishra, Hugh Geaney,

Shalini Singh, \* Kevin M. Ryan\*

Department of Chemical Sciences and Bernal Institute, University of Limerick, Limerick, Ireland

## 1. Experimental Section:

**1.1. Chemicals:** Sodium hydroxide (**NaOH**), Triphenyl antimony (**Ph<sub>3</sub>Sb**), Sulphur powder, oleic acid (**OA**), Oleylamine (**OLA**), Lauric acid (**LAc**), octanoic acid (**OctAc**) and butanoic acid (**ButAc**), dodecyl amine (**DDAm**), octyl amine (**OctAm**), butyl amine (**ButAm**), anhydrous hexane, acetone and methanol were purchased from sigma Aldrich and used without further purification treatment.

**1.2. Preparation of Oleylamine-Sulfur complex (OLA-S).** S source was made by stirring 0.3 mmol of sulphur powder in 2 mL of OLA under Ar atmosphere until a red solution formed.

**1.3. Synthesis of NaSbS<sub>2</sub>.** For the synthesis of NaSbS<sub>2</sub> NCs, a total of 0.4 mmol of a 3:1 molar mixture of NaOH (0.3 mmol/11.7mg) and Ph<sub>3</sub>Sb (0.1 mmol/35mg) powder was stirred with 8 mL (0.024 moles) of OLA and 2 mL (0.006 moles) of OA. For 30 minutes, the reaction solution was evacuated at 120 °C. During the evacuation, the pressure of the vacuum pump was maintained below 200 mTorr. The reaction mixture was then heated to 250 °C in an argon atmosphere. After heating the solution to 250 °C, 2 mL of OLA-S precursor was rapidly injected. The reaction solution was kept at this temperature for 30 minutes after injection. The flask was then cooled to 90 °C by disconnecting the heating mantle. The final NaSbS<sub>2</sub> NCs were precipitated by adding 8 mL of hexane followed by centrifugation as described below.

**1.4. Synthesis of NaSbS<sub>2</sub> at different temperatures.** In a three-neck flask containing 8 mL of OLA and 2 mL of OA, NaOH (0.3 mmol/11.7mg) and Ph<sub>3</sub>Sb (0.1 mmol/35mg) powder were introduced to synthesize NaSbS<sub>2</sub> at different reaction temperatures. For 40 minutes, the mixture was evacuated at 120 °C. After heating the solution to 280 and 310 °C in an argon atmosphere, 2 mL of OLA-S precursor was rapidly injected. After injection, the reaction solution was held at this temperature for 30 minutes. By removing the heating mantle, the flask was cooled to 90 °C. To precipitate the NaSbS<sub>2</sub> NCs, 8 mL of hexane was added.

**1.5. Synthesis of NaSbS<sub>2</sub> with different chain length ligands.** We conducted two studies using systematic ligand composition change keeping the molar ratio of amine: acid (4:1 moles) constant to explain the effect of ligands. Oleic acid (OA) or oleylamine (OLA) was used as the starting materials for each reaction, while the counterpart was changed with acid or amines of different chain length. In one series of experiment the reaction was carried out using a combination of oleylamine and different chain length carboxylic acids including lauric acid (**LAc**), octanoic acid (**OctAc**) and butanoic acid (**ButAc**) while in another series the reaction was carried out using oleic acid and different amine like dodecyl amine (**DDAm**), octyl amine (**OctAm**) and butyl amine (**ButAm**).

**1.6. Purification of the NCs.** The synthesized NCs quenched with 10 mL of hexane were transferred in 50 mL centrifuge tubes and vortex properly, then centrifuged for 3 minutes at 5000 rpm. The supernatant was discarded and the residue was

collected. At this stage in the residue, two different products (reddish NCs with some white gel-like by-products) could be distinguished by color. We used a mixture of nonpolar and aprotic polar solvents to remove by-products. The residue was dispersed in a mixture of hexane (5 mL) and acetone (3 mL). The solution was then centrifuged at 5000 rpm for 5 minutes. We were able to reduce gel-like by-product but it was still present with the NCs in the residue. The residue was then further purified with a methanol/hexane (3 mL:5 mL) solution at 5000 rpm for 5 minutes. We noticed the complete removal of the by-product (white gel) after methanol/hexane wash. The NCs were then characterized with different techniques as mentioned below.

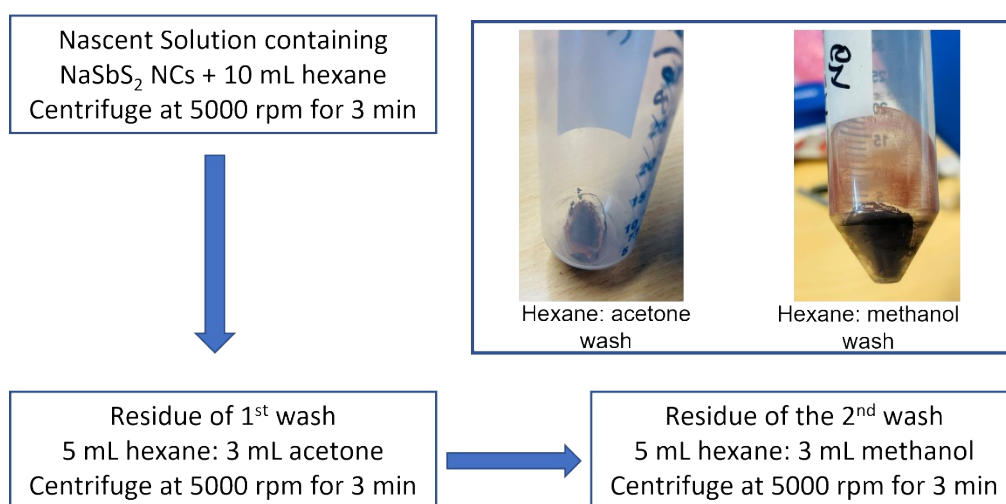

**Scheme S1: Schematic description of washing procedure for purification of NCs.**

## 2. Characterization Methods.

Transmission electron microscopy (TEM) and angular dark-field scanning transmission electron microscopy (DFSTEM) of synthesized NCs was carried out using a 200 kV JEOL JEM-2011F microscope equipped with a Gatan camera. Washed samples were drop casted on a glass slide for XRD analysis. The XRD patterns of samples reported were acquired on an Empyrean X-ray diffractometer equipped with a Cu K $\alpha$  radiation and a Lynxeye one dimensional detector. The XPS analysis of samples were carried out on Kratos Axis Ultra spectrometer. Binding energies (BE) were determined using C 1s at 284.8 eV as a charge reference. The samples were drop-cast on glass slides and dried under Ar before measurements. FTIR measurements were performed on a PerkinElmer FTIR instrument. The previously washed and dried sample was used for FTIR measurements.

## 3. Transport properties measurements.

Approximately 0.1 g of NC was synthesized for transport property measurements. The NCs were carefully washed via a series of washing cycles to remove the surface ligands until they were unable to disperse well in the solvent. Before measuring the

transport properties, the washed NCs were vacuum-dried overnight in an oven at 80 °C. The dried powder was then cold pressed into a 60  $\mu\text{m}$  thick pellet at a pressure of 5 MPa for 60 seconds using 100 mg of  $\text{NaSbS}_2$  powder.

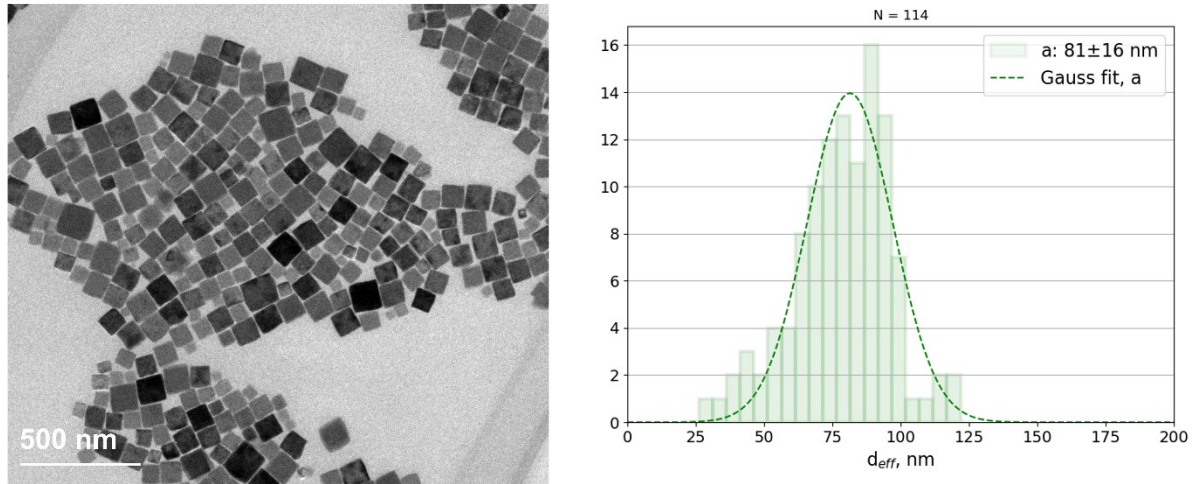

Figure S1. Size distribution histogram for  $\text{NaSbS}_2$  synthesized at 250 °C.

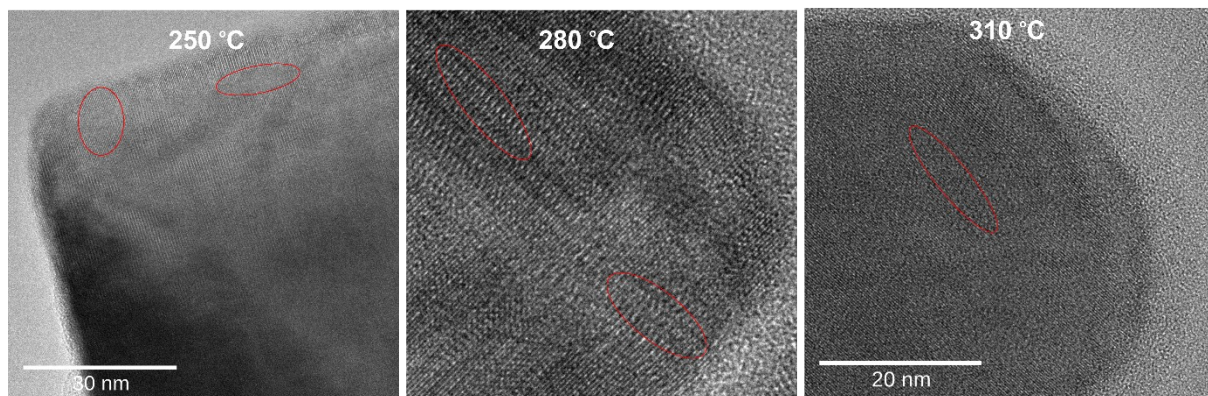

Figure S2. HRTEM of  $\text{NaSbS}_2$  NCs synthesized at different reaction temperatures (250, 280 and 310 °C) respectively.

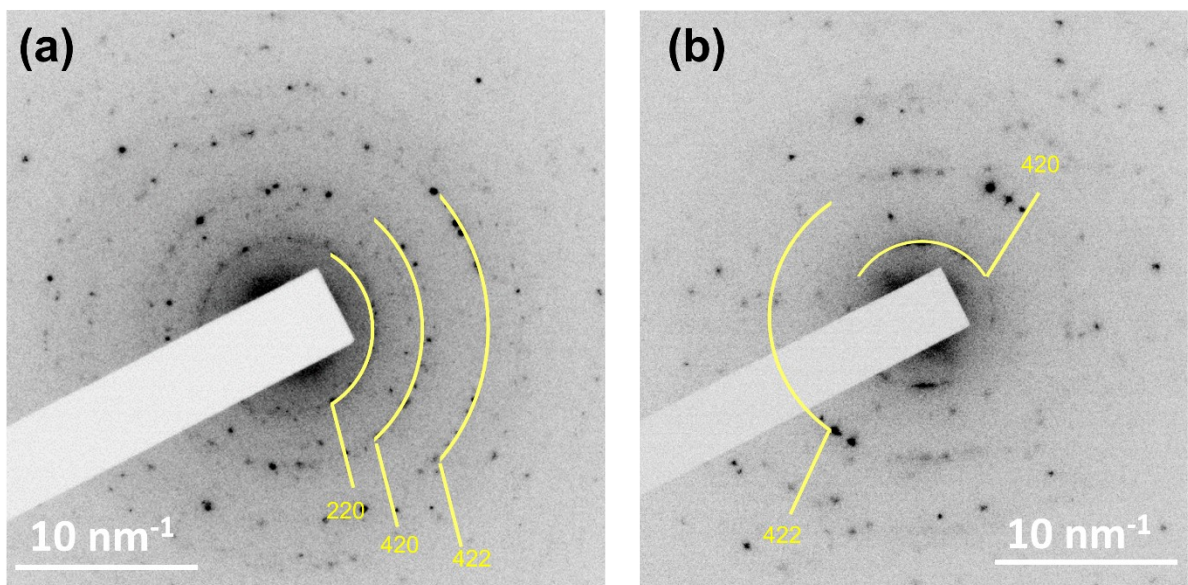

Figure S3. (a, b) Selected area electron diffraction pattern for NaSbS<sub>2</sub> NCs obtained at different temperatures (280 and 310 °C) respectively.

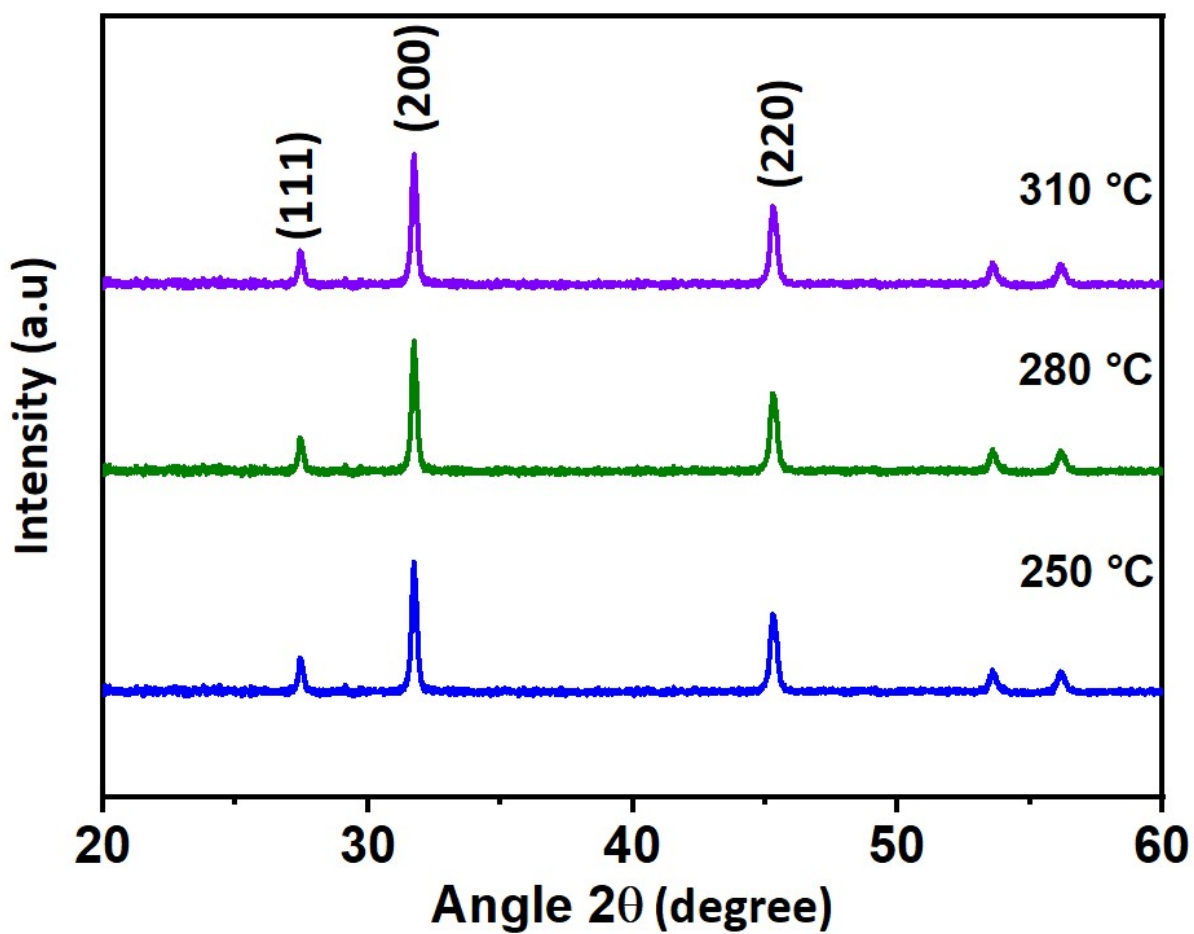



Figure S4. XRD spectra of NaSbS<sub>2</sub> NCs synthesized at 250, 280 and 310 °C

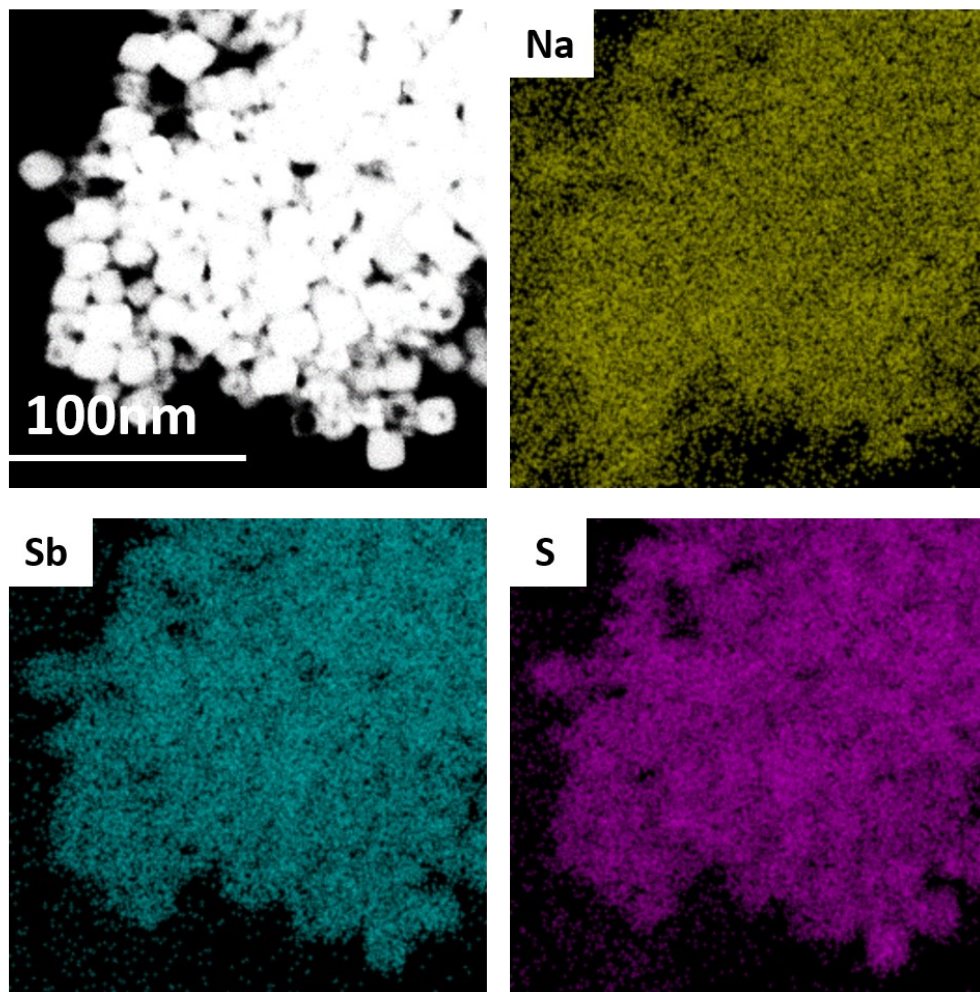

Figure S5. EDX elemental mapping for NaSbS<sub>2</sub> nanocubes for 280 °C sample.

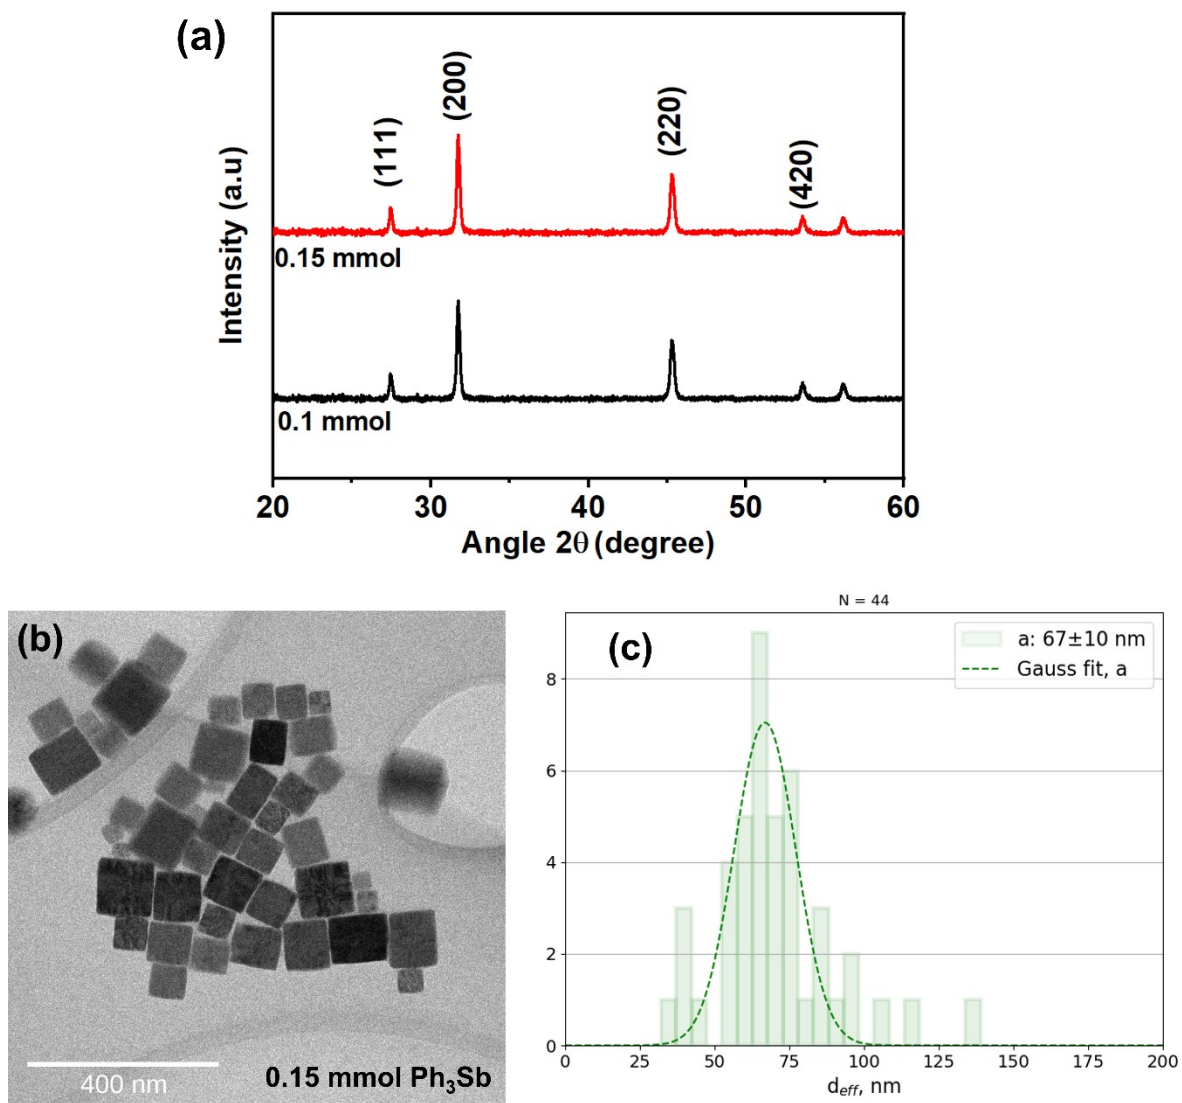

Figure S6: (a) TEM images of  $\text{NaSb}_2$  NCs grown from 0.15 mmol Sb precursor, (b) XRD pattern of  $\text{NaSb}_2$  NCs prepared using 0.1 and 0.15 mmol of Sb precursor.

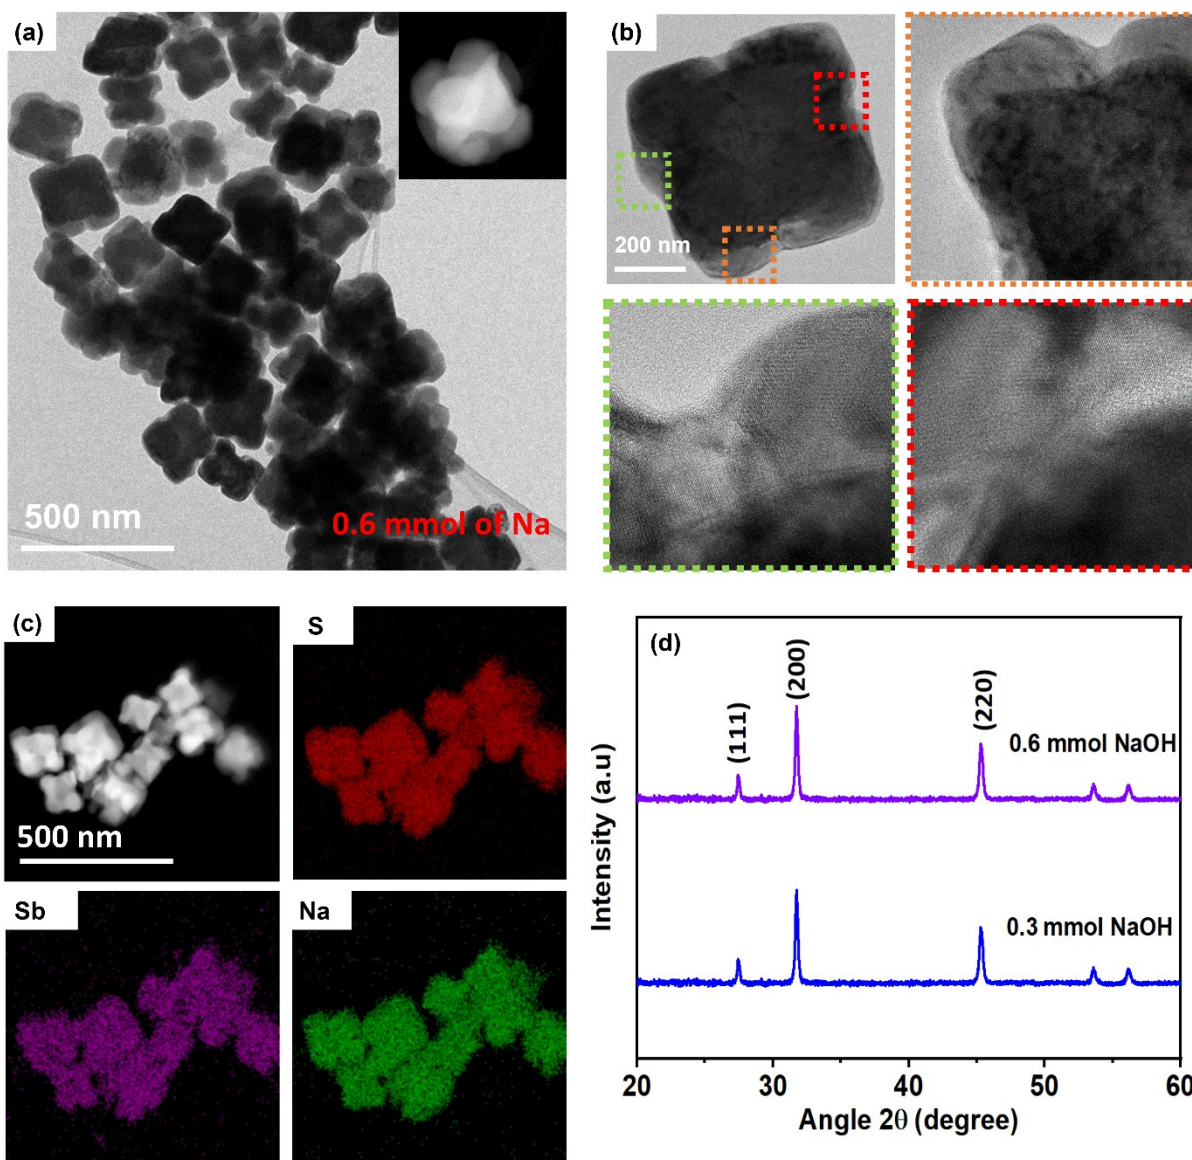

Figure S7: (a, b) TEM images and magnified TEM images of selected areas of NaSbS<sub>2</sub> NCs grown from 0.6 mmol Na precursor, (c) EDX elemental mapping of the NaSbS<sub>2</sub> NCs for the sample prepared with 0.6 mmol of Na precursor, and (d) XRD pattern of NaSbS<sub>2</sub> NCs prepared using 0.3 and 0.6 mmol of Na precursor.



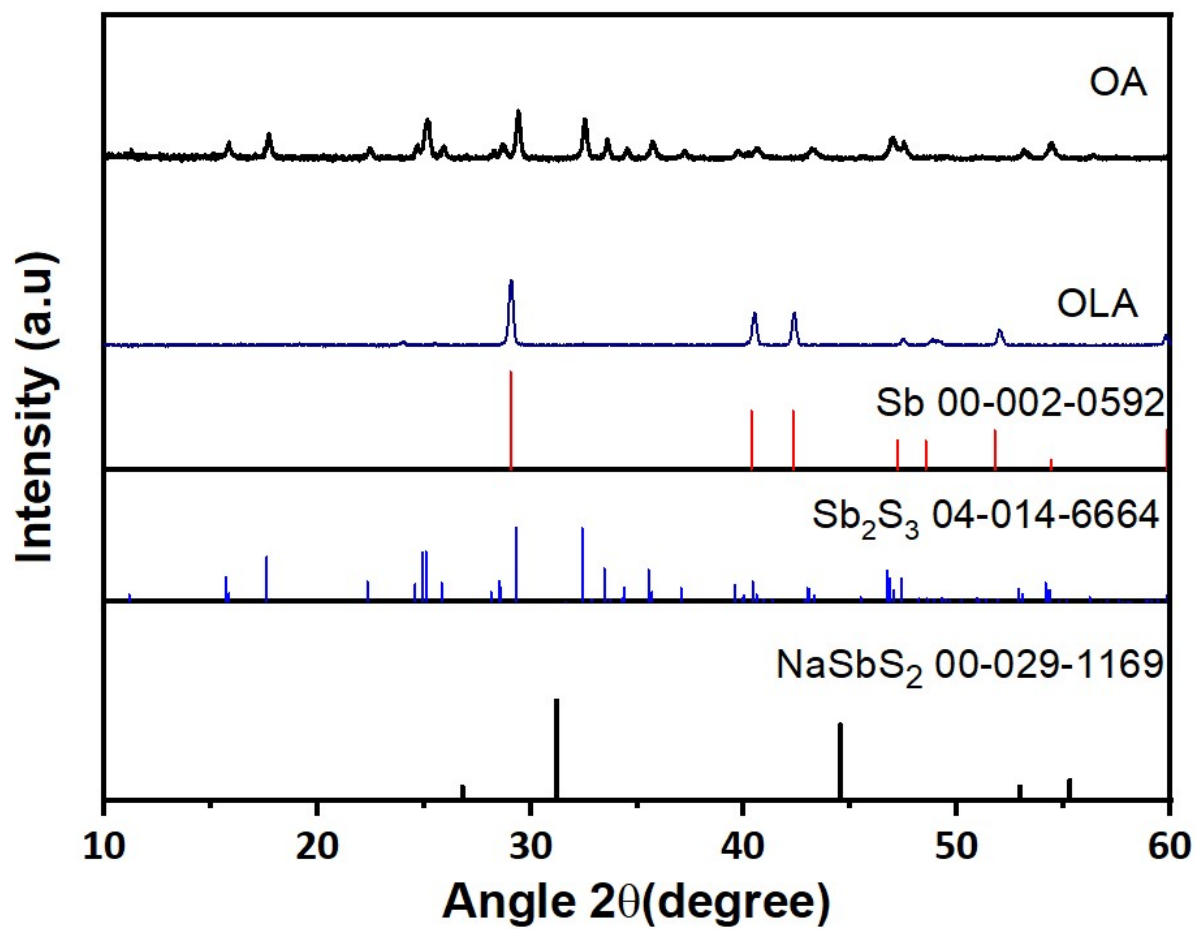

Figure S8. XRD pattern of ligand-controlled reactions for NaSbS<sub>2</sub>.

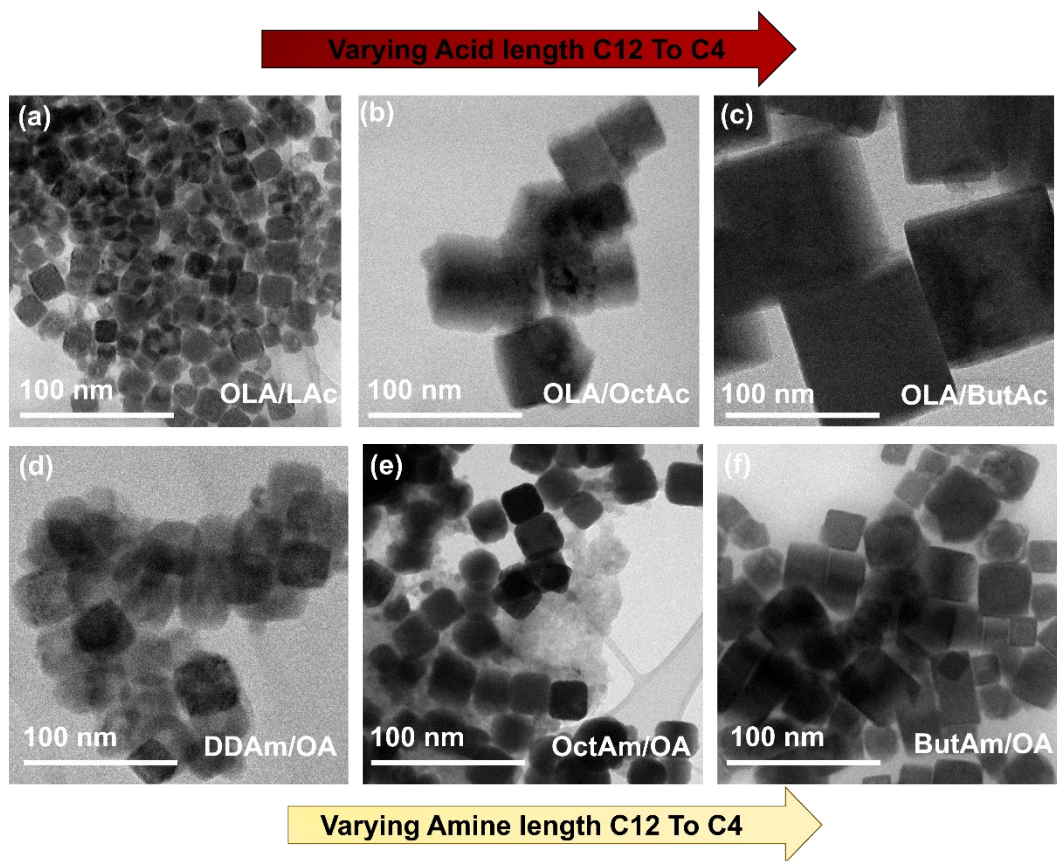

Figure S9: Low resolution TEM images of  $\text{NaSbS}_2$  NCs from 250 °C using acid and amines of different chain lengths. Panel (a-c) shows TEM images for variation of acid from C12 to C4 . Panel (d-f) shows TEM images of amines from C12 to C4.

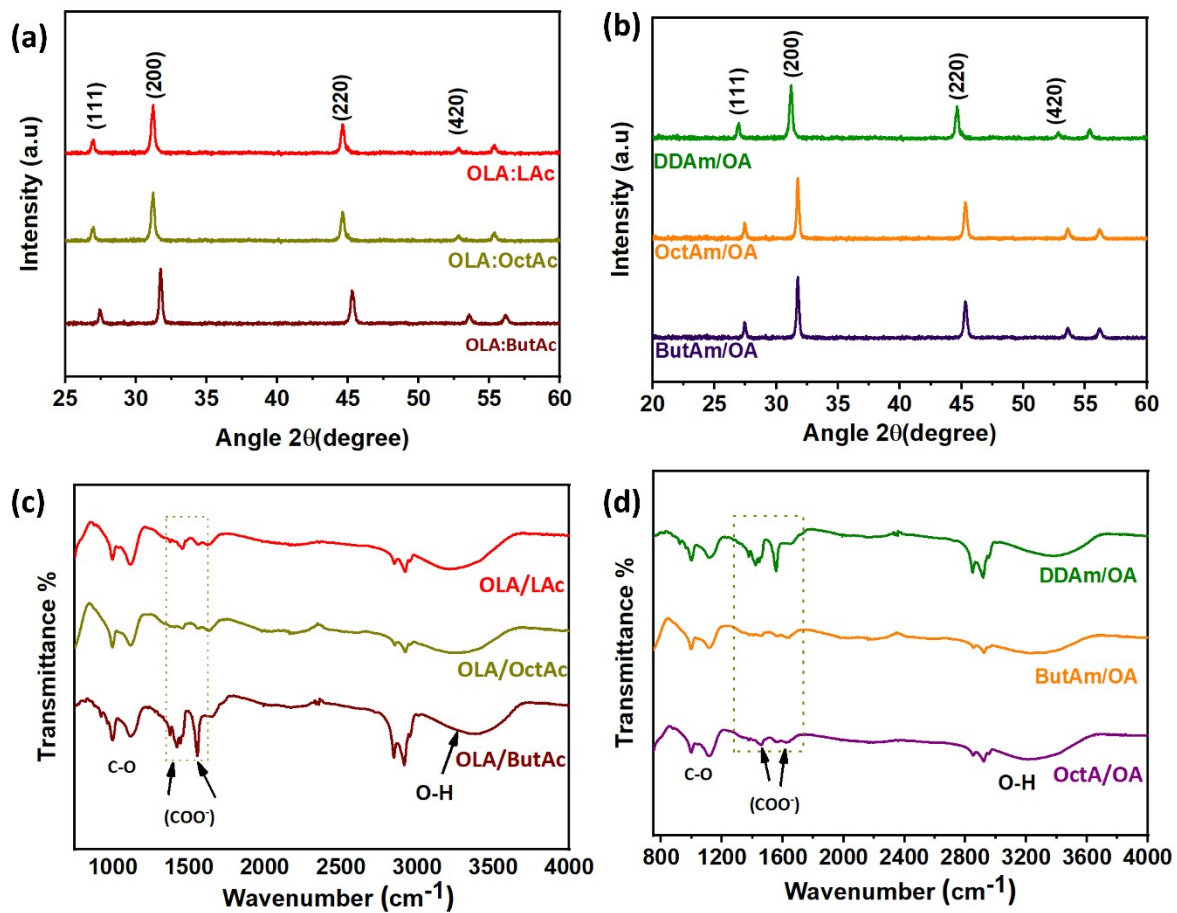

Figure S10. XRD pattern of NaSbS<sub>2</sub> NCs synthesized with different chain length of (a) carboxylic acid (b) amines and FTIR spectra (c and d respectively).

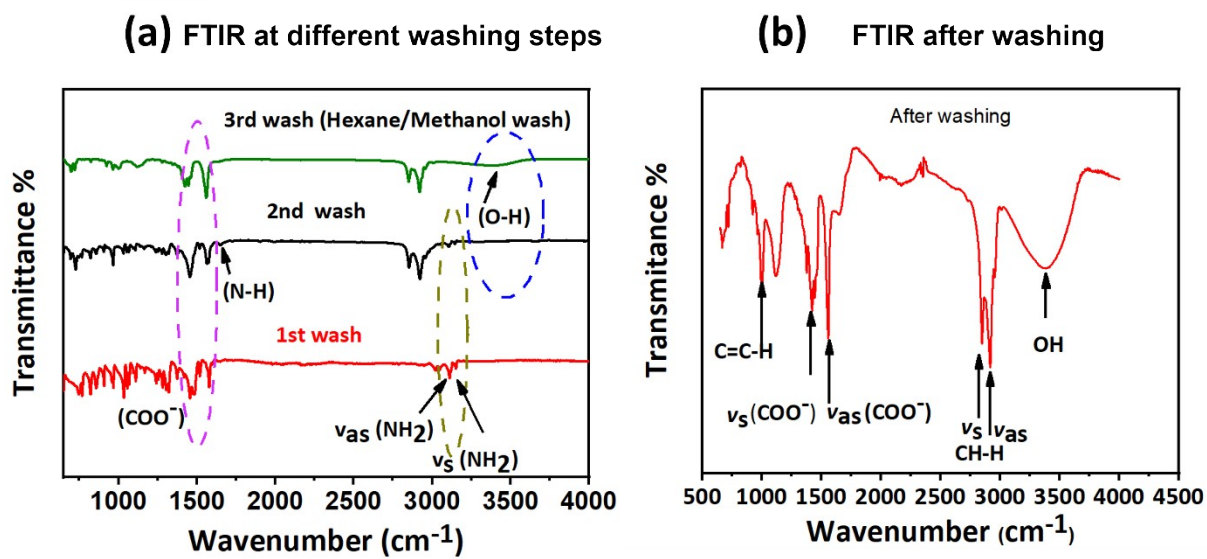

Figure S11. (a) shows FTIR spectra of the NaSbS<sub>2</sub> sample at different washing steps and (b) shows FTIR spectra of the NaSbS<sub>2</sub> sample after purification.



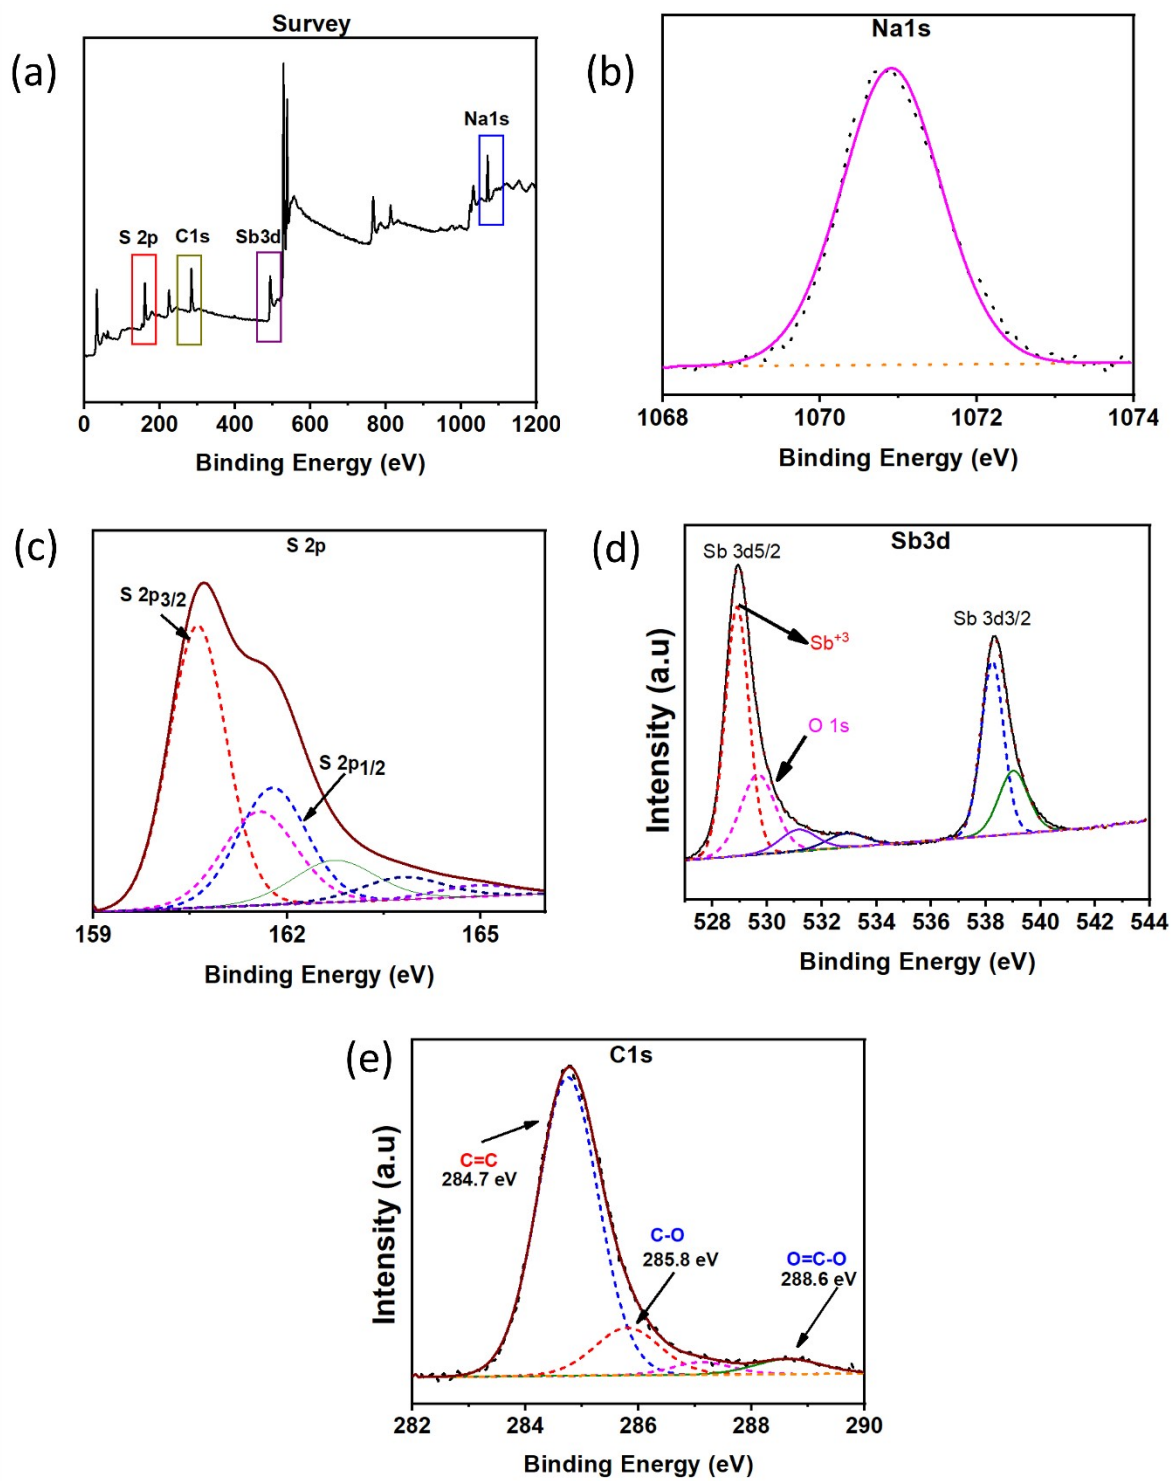

Figure S12. XPS analysis of cubic  $\text{NaSbS}_2$  (a) survey (b) Na 1s (c) S 2p (d) Sb 3d (e) C 1s.

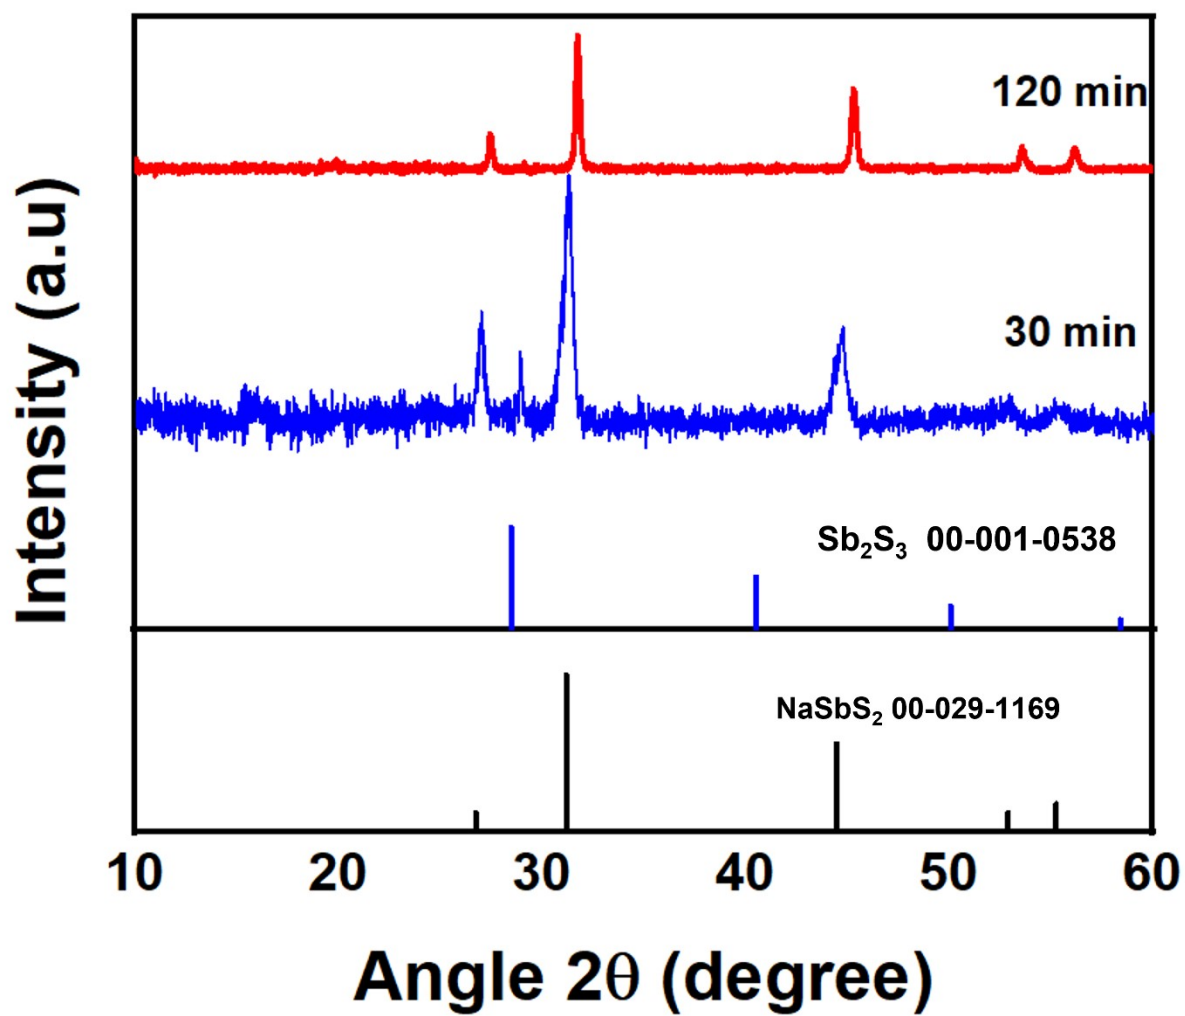

Figure S13: Xrd of NaSbS<sub>2</sub> NCs prepared using Na oleate and Sb oleate at 250 °C.

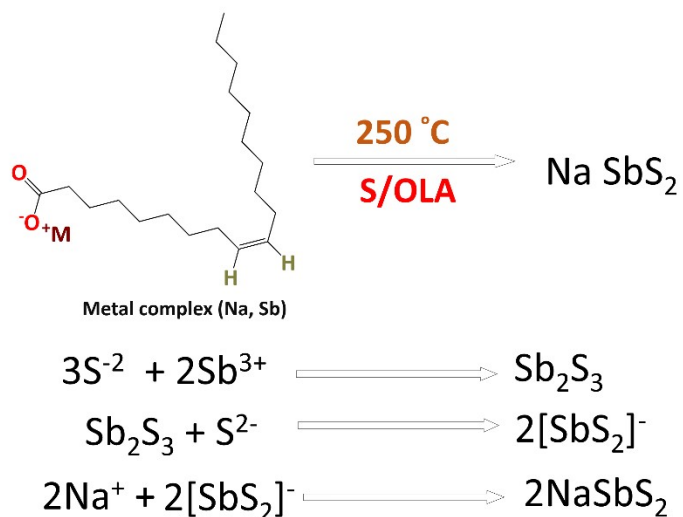

Figure S14. Schematic for the proposed reaction mechanism for the synthesis of NaSbS<sub>2</sub>.

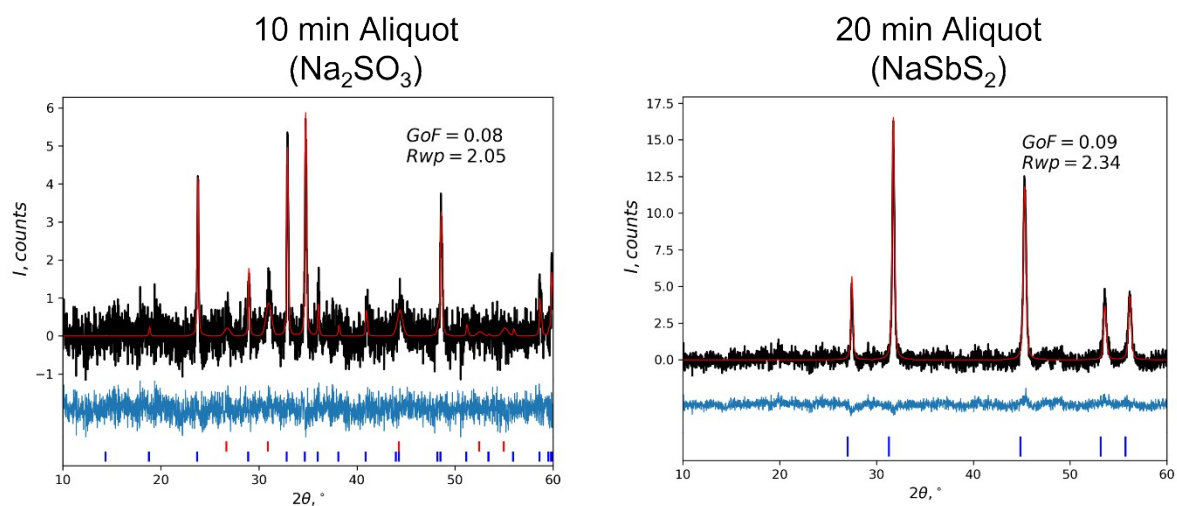

Figure S15: Rietveld refinement graphs of the XRD pattern of 10 min and 20 min aliquots. The lattice parameters fit with the CIF file 00-005-0653 (Na<sub>2</sub>SO<sub>3</sub>) and 00-029-1169 (NaSbS<sub>2</sub>).

Table S1: Table collated different reaction conditions for the synthesis of NaSbS<sub>2</sub>.

| Sr# | Reaction precursors                                                      | Reaction time | Product                                             | Reaction temperature | Solvent    | Injection         |
|-----|--------------------------------------------------------------------------|---------------|-----------------------------------------------------|----------------------|------------|-------------------|
| 1   | Sb <sub>2</sub> S <sub>3</sub> + S + Na <sub>2</sub> S.9H <sub>2</sub> O | 2 hr          | Sb <sub>2</sub> S <sub>3</sub>                      | 250 °C               | OLA/ODE    |                   |
| 2   | Sb(III) acetate + Na <sub>2</sub> S + 1-ddt                              | 30min         | Sb <sub>2</sub> S <sub>3</sub>                      | 250 °C               | OLA/ODE    |                   |
| 3   | Sb (III) Cl + Na <sub>2</sub> S + S                                      | 1hr           | Sb <sub>2</sub> S <sub>3</sub> +NaCl                | 250 °C               | OLA/ODE    |                   |
| 4   | Sb (III) Cl + NaOH + S                                                   |               | Sb <sub>2</sub> S <sub>3</sub> +NaCl                | 250 °C               | OLA/ODE    |                   |
| 5   | Ph <sub>3</sub> Sb + NaOH + S                                            | 3 hr          | NaSbS <sub>2</sub> + Sb <sub>2</sub> S <sub>3</sub> | 250 °C               | OLA/OA/ODE |                   |
| 6   | Ph <sub>3</sub> Sb + NaOH + S                                            | 30min to 5hr  | NaSbS <sub>2</sub>                                  | 250 °C               | OLA/OA     |                   |
| 7   | Ph <sub>3</sub> Sb + NaOH + S                                            | 30            | NaSbS <sub>2</sub>                                  | 150 to 350 °C        | OLA/OA     |                   |
| 8   | Ph <sub>3</sub> Sb + NaOH + S                                            | 30            | NaSbS <sub>2</sub>                                  | 250 °C               | OLA/OA     | Double injection  |
| 9   | Ph <sub>3</sub> Sb + Na <sub>2</sub> S + S + NaOH                        | 30            | NaSbS <sub>2</sub>                                  | 250 °C               |            | Excess of sulphur |
| 10  | Sb <sub>2</sub> S <sub>3</sub> + S + NaOH + 1-ddt                        | 12hr          | Sb <sub>2</sub> S <sub>3</sub>                      | 250 °C               | OLA/OA     |                   |

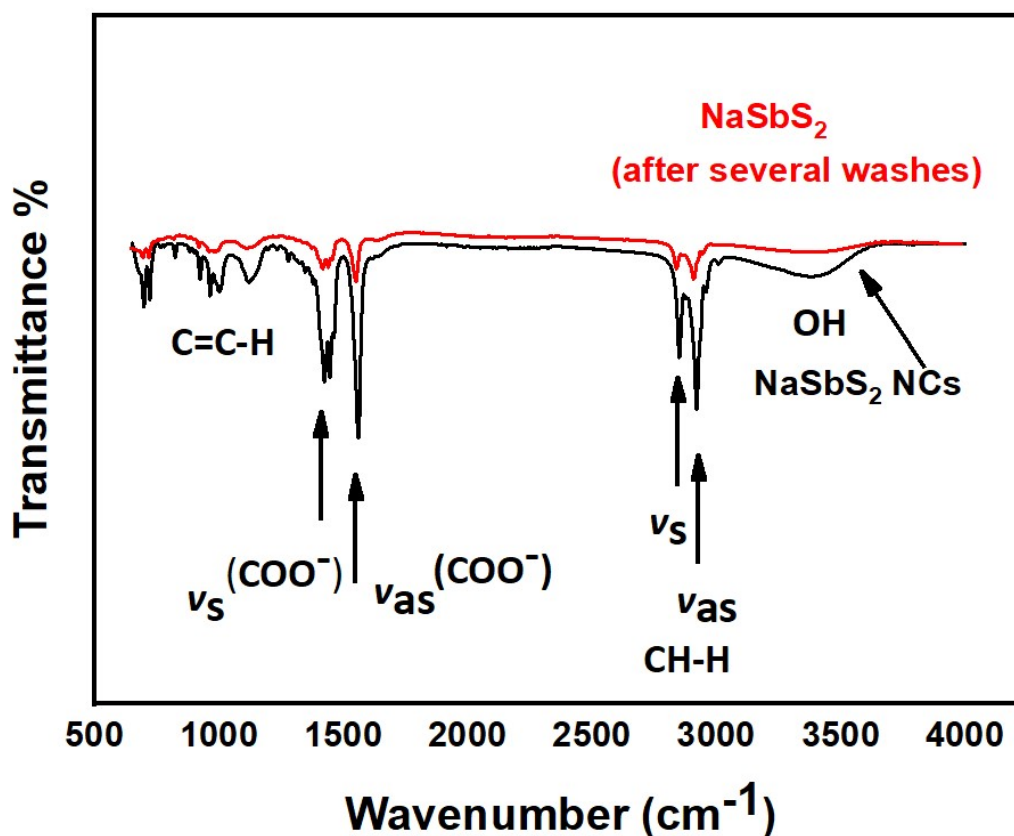

Figure S16. shows FTIR spectra of the NaSbS<sub>2</sub> NCs after washing and NaSbS<sub>2</sub> NCs after several washes for transport properties measurements.
